# Supplementary material
Source: publisher figshare collection journal article supplement (https://springernature.figshare.com/ndownloader/files/14136653)
Supplement: Supplementary file 1 [file 14136653]

## Sheet: README
Additional File 1
Sources searched for peer-reviewed and grey literature
Tab	Description
"Peer-reviewed literature search"	A list of sources searched along with searching parameters and dates
"Grey literature search history"	A list of sources searched along with searching parameters and dates
"Grey literature results"	List of included literature from grey literature searching

## Sheet: Peer-reviewed literature search
Source	Subscriptions	Date Range Subscribed	Search options used	Date searched
Web of Science	Web of Science consists of nine databases: Arts & Humanities Citation Index, Social Sciences Citation Index, and Science Citation Index Expanded for journal aritcles; Conference Proceedings Citation Index - Science and Conference Proceedings - Social Sciences and Humanities; Book Citation Index - Science and Book Citation Index - Social Sciences and Humanities; and Current Chemical Reactions and …	2014-2016	Language: English. Formats: Journal Articles, Conference Proceedings, Books, Book Chapters	2016-11-30
Web of Science	Web of Science consists of nine databases: Arts & Humanities Citation Index, Social Sciences Citation Index, and Science Citation Index Expanded for journal aritcles; Conference Proceedings Citation Index - Science and Conference Proceedings - Social Sciences and Humanities; Book Citation Index - Science and Book Citation Index - Social Sciences and Humanities; and Current Chemical Reactions and …	1900-2014	Language: English. Formats: Journal Articles, Conference Proceedings, Books, Book Chapters	2017-03-03
Agris	All included resources	1965-present	Language: English	2016-11-30
AGRICOLA	All included resources	1962-present	Language: English	2016-11-30
GreenFile	All included resources	2008-present	Language: English	2016-11-30
EconLit	All included resources	1969-present	Language: English	2016-11-30
CAB Abstracts	All included resources	All	Language: English	2016-11-30

## Sheet: Grey literature Search History
Source	Website	Search type	Date	Search Terms	Result-checking method	Hits	Outputs	Notes
Poverty and Conservation Learning	http://povertyandconservation.info/en/bibliographies	Keyword search	1/10/2017	Forests AND Poverty	First 100 T&A screened	190	23	Many of the papers were excluded due to no intervention or evidence related to that intervention presented. Some were excluded as they dealt with subsistence use of the forest.
International Initiative for Impact Evaluation	http://www.3ieimpact.org/	Searched ALL	1/17/2017	N/A	T&As screened	7	2	Evidence Gap Maps
		Searched ALL	1/17/2017	N/A	T&As screened	86	0	Policy Briefs
		Keyword search	1/17/2017	Forests	Titles screened	13	5	Systematic Reviews
		Keyword search	1/17/2017	Forests	T&As screened	43	12	Impact Evaluations
Collaboration for Environmental Evidence	http://www.environmentalevidence.org/	Keyword search	1/17/2017	Forest	T&As screened	10	4
J-Poverty Action	https://www.povertyactionlab.org/evaluations	Keyword search	1/18/2017	Forest	T&As screened	6	0	Evaluations
	https://www.povertyactionlab.org/publications?search_api_views_fulltext=forest	Keyword search	1/18/2017					Policy Publications search box did not work; tried Google search but no relevant documents retreived.
World Bank Development Impact Evaluation Initiative (DIME)	http://www.worldbank.org/en/research/dime
	http://microdata.worldbank.org/index.php/catalog/impact_evaluation	Keyword search	1/18/2017	Poverty (Forest = 0)	T&As screened	12	0	"Forests" yielded no result so used poverty.
	http://documents.worldbank.org/curated/en/docsearch/collection-title/Impact%2520Evaluation%2520series?colT=Impact%2520Evaluation%2520series	Keyword search	1/18/2017	Forest	T&As screened	5	2
DAI Evidence on Demand	http://www.evidenceondemand.info/library.aspx	Keyword search	1/19/2017	Forest	T&Summaries screened	32	3	Many documents not relevant
International Food Policy Research Institute Library	http://library.ifpri.info/	Keyword search	1/19/2017	Forest AND Livelihood AND Poverty	First 100 T&As screened	300	3	Majority of documents are agriculture-related.
Center for International Forestry Research	http://www.cifor.org/library	Keyword search	1/24/2017	Forests AND Livelihoods	First 100 T&As screened	4584	9	Majority of documents were theoretical or large reviews of forestry/livelihoods issues with no apparent evidence.
Ecosystem Services for Poverty Alleviation	http://www.espa.ac.uk/results/publications	Keyword search	1/24/2017	Forests	T&As screened	7	0	None were relavant to forests and poverty.
Centre for Environmental Economics and Policy in Africa								**Links on website not working; tried Google search but no relevant documents retreived.
Latin American and Caribbean Environmental Economics Program	http://www.laceep.org/	Keyword search	1/25/2017	Forests	T&As screened	70	2	Search for "Forests" AND "Poverty" only yielded 2 results. The 70 results that "Forests" yielded did include many duplicates.
Economy and Environment Program for Southeast Asia	http://www.eepsea.org/	Keyword search	1/26/2017	Forests And/Or Poverty	T&As screened	68	1	Search for "Forests" AND "Poverty" only yielded 3 results. Some of the results were duplicates and many were not relevant to forests.
South Asian Network for Development and Environmental Economics	http://www.sandeeonline.org/	Keyword search	1/28/2017	Forests	T&As screened	17	2	Search for "Forests" AND "Poverty" did not yield any results.
World Agroforestry Center	http://www.worldagroforestry.org/	Keyword search	1/28/2016	Forests AND Livelihoods	T&As screened	5	2	Search yielded more results than "Forests" and "Poverty"
International Tropical Timber Organization	http://www.itto.int/							**Search bar on website not working; tried Google search but no relevant documents retreived.
						681	70
							70
		0.628188

## Sheet: Grey literature results
	Date	Source	Publication Type	Authors	Title	Year	Publisher/Journal	Screening decision	Captured in database searching?	Captured in target searches for systematic reviews/maps/gap maps	Final inclusion
1	2017-01-10	Poverty and Conservation Learning	Peer-reviewed published literature	Sims and Alix-Garcia	Parks versus PES: Evaluation direct and incentive-based land conservation in Mexico	2016	Journal of Environmental Economics and Management	Yes			Yes
2	2017-01-10	Poverty and Conservation Learning	Peer-reviewed published literature	Borner, Wunder, and Giudice	Will up-scaled forest conservation incentives in the Peruvian Amazon produce cost-effective and equitable outcomes?	2016	Environmental Conservation	No
3	2017-01-11	Poverty and Conservation Learning	Peer-reviewed published literature	Hickey et al	Quantifying the economic contribution of wild food harvests to rural livelihoods: A global-comparative analysis	2016	Food Policy	Yes			Yes
4	2017-01-11	Poverty and Conservation Learning	Peer-reviewed published literature	Clements, T.	Impacts of protected areas on local livelihoods in Cambodia	2014	World Development	Yes	Yes
5	2017-01-11	Poverty and Conservation Learning	Peer-reviewed published literature	Zhang et al	Sustainability of social–ecological systems under conservation projects: Lessons from a biodiversity hotspot in western China	2013	Biological Conservation	No
6	2017-01-11	Poverty and Conservation Learning	Peer-reviewed published literature	Oyono et al	Beyond the decade of policy and community euphoria: The state of livelihoods under new local rights to forest in rural Cameroon	2012	Conservation and Society	Yes	Yes
7	2017-01-11	Poverty and Conservation Learning	Peer-reviewed published literature	de Koning et al	Bridging the gap between forest conservation and poverty alleviation: the Ecuadorian Socio Bosque program	2012	Environmental Science & Policy	Yes	Yes
8	2017-01-11	Poverty and Conservation Learning	Peer-reviewed published literature	Groom & Palmer	REDD+ and rural livelihoods	2012	Biological Conservation	Yes	Yes
9	2017-01-11	Poverty and Conservation Learning	Peer-reviewed published literature	Lybbert et al	Biodiversity Conservation and Poverty Traps Special Feature: Booming markets for Moroccan argan oil appear to benefit some rural households while threatening the endemic argan forest	2011	PNAS	Yes	Yes
10	2017-01-11	Poverty and Conservation Learning	Peer-reviewed published literature	McNally et al	Biodiversity Conservation and Poverty Traps Special Feature: The effect of a protected area on the tradeoffs between short-run and long-run benefits from mangrove ecosystems	2011	PNAS	Yes			Yes
11	2017-01-11	Poverty and Conservation Learning	Unpublished grey literature	Porras et al	Fair and Green? Social impacts of payments for environmental services in Costa Rica	2010	IIED	No
12	2017-01-11	Poverty and Conservation Learning	Peer-reviewed published literature	Sreedharan and Matta	Poverty alleviation as a pathway to sustainable forest management	2010	Environment, Development, and Sustainability	Yes			Yes
13	2017-01-11	Poverty and Conservation Learning	Peer-reviewed published literature	Ghate et al	Local institutions as mediators of the impact of markets on non-timber forest product extraction in central India	2009	Environmental Conservation	Yes	Yes
14	2017-01-15	Poverty and Conservation Learning	Peer-reviewed published literature	Gubbi and MacMillan	Can Non-timber Forest Products Solve Livelihood Problems? A Case Study from Periyar Tiger Reserve India	2008	Oryx	Yes	Yes
15	2017-01-15	Poverty and Conservation Learning	Peer-reviewed published literature	Muhammed and Haque	The role of participatory social forestry in the enhancement of the socio-economic condition of the rural poor: A case study of Dhaka Forest Division in Bangladesh	2008	Forests, Trees and Livelihoods	Yes			Yes
16	2017-01-15	Poverty and Conservation Learning	Peer-reviewed published literature	McNeely	A Zoological Perspective on Payments for Ecosystem Services	2007	Integrative Zoology	No
17	2017-01-15	Poverty and Conservation Learning		Acharya and Acharya	Livelihoods and Forestry Program, Myagdi Contribution to Poverty Reduction	2007	Banko Janakari: A journal of forestry information for Nepal	No
18	2017-01-15	Poverty and Conservation Learning	Peer-reviewed published literature	Bawa et al	Poverty, biodiversity and institutions in forest-agriculture ecotones in the Western Ghats and Eastern Himalaya ranges of India	2007	Agriculture, Ecosystems and Environment	Yes	Yes
19	2017-01-15	Poverty and Conservation Learning	Peer-reviewed published literature	Assembe Mvondo, S.	Forestry Income Management and Poverty Reduction: Empirical Findings from Kongo, Cameroon	2006	Development in Practice	Cannot locate
20	2017-01-15	Poverty and Conservation Learning	Unpublished grey literature	FAO	Better Forestry, Less Poverty: A Practitioner's Guide	2006	FAO Forestry Paper	Cannot locate
	2017-01-15	Poverty and Conservation Learning	Unpublished grey literature	Soontornwong, S.	Improving Rural Livelihood Through CBNRM: A Case of Self-organization in Community Mangrove Management in Thailand	2006	Report, Regional Community Forestry Training Center for Asia-Pacific, Bangkok, Thailand	No
	2017-01-15	Poverty and Conservation Learning	Peer-reviewed published literature	Kaushal et al	Sustainable Poverty Alleviation Through a Forestry Project in Tamilnadu State of India	2005	The International Journal of Sustainable Development and World Ecology	Yes	Yes
	2017-01-15	Poverty and Conservation Learning	Unpublished grey literature	Jumbe and Angelsen	Do the Poor Benefit from Devolution Policies? Evidence from Malawi’s Forest Co-Management Program	2005	Paper, Department of Economics and Resource Management, Norwegian University of Life Sciences	Yes	Yes
	2017-01-16	3ie (Evidence Gap Map)	Unpublished grey literature	Puri et al	Forest Conservation Gap Map	2016	3ie (Evidence Gap Map)	Yes		Yes
	2017-01-16	3ie (Evidence Gap Map)	Unpublished grey literature	Snilsveit et al	Land Use Change and Forestry Evidence Gap Map	2015	3ie (Evidence Gap Map)	Yes		Yes
	2017-01-16	3ie (Systematic Review)	Unpublished grey literature	Samii et al	Decentralised forest management for reducing deforestation and poverty in low- and middle- income countries: a systematic review	2014	3ie (Systematic Review)	Yes		Yes
	2017-01-16	3ie (Systematic Review)	Unpublished grey literature	Samii et al	Payment for environmental services for reducing deforestation and poverty in low- and middle-income countries: a systematic review	2014	3ie (Systematic Review)	Yes		Yes
	2017-01-16	3ie (Systematic Review)	Unpublished grey literature	Bowler et al	The evidence base for community forest management as a mechanism for supplying global environmental benefits and improving local welfare	2012	3ie (Systematic Review)	Yes		Yes
	2017-01-16	3ie (Systematic Review)	Unpublished grey literature	Newton et al	What are the Biophysical, Institutional, and Socioeconomic Contextual Factors Associated with Improvements in Livelihood and Environmental Outcomes in Forests Managed by Communities? A Systematic Review Protocol	2015	3ie (Systematic Review)	No
	2017-01-16	3ie (Systematic Review)	Unpublished grey literature	Rodriguez et al	Socioeconomic and Environmental Effects of China’s Conversion of Cropland to Forest Program after 15 Years: A Systematic Review Protocol	2015	3ie (Systematic Review)	No
	2017-01-16	3ie (Impact Evaluation)	Peer-reviewed published literature	Jumbe and Angelsen	Has forest co-management in Malawi benefited to the poor?	2007	In Vladimir Popov (Ed.), January 2007, Political Institutions and Development: Failed Expectations and Renewed Hopes, pp. 171-199	Yes	Yes
	2017-01-16	3ie (Impact Evaluation)	Peer-reviewed published literature	Rahut et al	Household participation and effects of community forest management on income and poverty levels: empirical evidence from Bhutan	2015	Forest Policy and Economics; 2015 61:20-29	Yes			Yes
	2017-01-16	3ie (Impact Evaluation)	Peer-reviewed published literature	Jumbe and Angelsen	Do the Poor Benefit from Devolution Policies? Evidence from Malawi's Forest Co-Management Program	2006	Land Economics, November 2006, vol. 82, no. 4, pp. 562-581	Yes	Yes
	2017-01-17	3ie (Impact Evaluation)	Peer-reviewed published literature	Miranda et al	Effects of protected areas on forest cover change and local communities: evidence from the Peruvian Amazon	2016	World Development, February 2016, vol. 78, pp. 288-307	Yes	Yes
	2017-01-17	3ie (Impact Evaluation)	Peer-reviewed published literature	Mullan et al	Evaluation of the Impact of the Natural Forest Protection Program on Rural Household Livelihoods	2009	In Runsheng Yin (Ed.), 2009, An Integrated Assessment of China's Ecological Restoration Programs, pp. 175-199	Yes	Yes
	2017-01-17	3ie (Impact Evaluation)	Peer-reviewed published literature	Clements and Millner-Gull	Impact of payments for environmental services and protected areas on local livelihoods and forest conservation in northern Cambodia	2015	Conservation Biology, February 2015, ol. 29, issue 1, pp. 78-87	Yes	Yes
	2017-01-17	3ie (Impact Evaluation)	Peer-reviewed published literature	Hegde et al	Household participation in a Payments for Environmental Services programme: the Nhambita Forest Carbon Project (Mozambique)	2015	Environment and Development Economics; 2015 20(5):611-629	Yes	Yes
	2017-01-17	3ie (Impact Evaluation)	Peer-reviewed published literature	Ameha et al	Impacts of access and benefit sharing on livelihoods and forest: case of participatory forest management in Ethiopia	2014	Ecological Economics, January 2014, vol. 97, pp. 162-171	Yes	Yes
	2017-01-17	3ie (Impact Evaluation)	Unpublished grey literature	Alix-Garcia et al	Environmental and socioeconomic impacts of Mexico's payments for ecosystem services program	2014	3ie Impact Evaluation Report 20, 2014. New Delhi	Yes	Yes
	2017-01-17	3ie (Impact Evaluation)	Unpublished grey literature	Sims, Katharine	Evaluating the Local Socio-Economic Impacts of Protected Areas: A System Level Comparison Group Approach	2008	Global Environmental Facility Evaluation Office, September 2008, Impact Evaluation	Cannot locate
	2017-01-17	3ie (Impact Evaluation)	Unpublished grey literature	Persha and Meshak	The impact of Tanzania’s Joint Forest Management programme on livelihoods, governance and forests	2016	A triple win? The impact of Tanzania’s Joint Forest Management programme on livelihoods, governance and forests, 3ie Impact Evaluation Report 34. New Delhi: International Initiative for Impact Evaluation (3ie)	Yes			Yes
	2017-01-17	3ie (Impact Evaluation)	Peer-reviewed published literature	Weber et al	Do ICDPs Work? An Empirical Evaluation of Forest-Based Microenterprises in the Brazilian Amazon	2011	Land Economics, November 2011, vol. 87, iss. 4, pp. 661-681	Yes	Yes
	2017-01-17	Collaboration for Environmental Evidence	Peer-reviewed published literature	Rodriguez et al	China’s conversion of cropland to forest program: a systematic review of the environmental and socioeconomic effects	2016	CEE review 15-004	Yes			Yes
	2017-01-17	Collaboration for Environmental Evidence	Peer-reviewed published literature	Samii et al	Effects of Decentralized Forest Management (DFM) on Deforestation and Poverty in Low and Middle Income Countries (systematic review)	2014	CEE review 13-015a	Duplicate
	2017-01-18	Collaboration for Environmental Evidence	Peer-reviewed published literature	Samii et al	Effects of Payment for Environmental Services (PES) on Deforestation and Poverty in Low and Middle Income Countries (systematic review)	2014	CEE review 13-015b	Duplicate
	2017-01-18	Collaboration for Environmental Evidence	Peer-reviewed published literature	Bowler et al	The Evidence Base for Community Forest Management as a Mechanism for Supplying Global Environmental Benefits and Improving Local Welfare (systematic review)	2010	CEE review 08-011	Duplicate
	2017-01-18	World Bank DIME	Unpublished grey literature	Wells et al	An evaluation of the impacts of selected activities supported by the program on forests (English)	2011	World Bank Working Paper 70512	No
	2017-01-19	World Bank DIME	Unpublished grey literature	Wells et al	An evaluation of the impacts of selected activities supported by the program on forests (English)	2011	World Bank Working Paper 70513	Duplicate
	2017-01-19	DAI Evidence on Demand	Unpublished grey literature	Mugo, F.W.	Rapid desk-based study: donor and partner programmes in sustainable forest management and fuelwood value chains in Eastern and Southern Africa	2014	Evidence on Demand	No
	2017-01-19	DAI Evidence on Demand	Unpublished grey literature	CTF	Strategic environment, social and gender assessment of the climate investment funds	2010	CTF Trust Fund Committee	No
	2017-01-19	DAI Evidence on Demand	Unpublished grey literature	OECD	Natural resources and pro-poor growth. The economics and politics	2008	OECD	No
	2016-01-23	IFPRI	Unpublished grey literature	Jagger et al	Woodlot devolution in Northern Ethiopia	2003	IFPRI EPTD Discussion Paper 107	No
	2016-01-23	IFPRI	Unpublished grey literature	Jagger, Pamela	Forest incomes after Uganda's forest sector reform	2008	IFPRI CAPRI Working Paper 92	Yes	Yes
	2016-01-23	IFPRI	Unpublished grey literature	Wollenberg et al	Collaborative management of forests	2004	IFPRI 2020 Vision Focus Brief 11 (8)	No
	2016-01-24	LACEEP	Unpublished grey literature	Solis, Carlos	Land Owners’ preferences for forest conservation programs: The Socio Bosque case in Ecuador	2015	LACEEP Working Paper Series WP77	No
	2016-01-24	LACEEP	Unpublished grey literature	Osorio, Catalina	The effects of markets on the use of forest for the livelihood of indigenous households in the Colombian Amazon	2009	LACEEP Working Paper Series WP09	Yes			Yes
	2016-01-24	EEPSEA	Unpublished grey literature	Ly, Nguyen	Evaluating the Pilot Implementation of Payment for Forest Environmental Services in Lam Dong, Vietnam	2013	EEPSEA Policy Brief	Yes			Yes
	2016-01-24	SANDEE	Unpublished grey literature	Khatri-Chhetri, Arun	Local Institutions and Forest Products Extraction: Evidence from Forest Management in Nepal	2006	SANDEE Working Paper No. 16-06	Yes			Yes
	2016-01-24	SANDEE	Unpublished grey literature	Adhikari, Bhim	Property Rights and Natural Resources: Socio-Economic Heterogeneity and Distributional Implications of Common Property Resource Management	2003	SANDEE Working Paper No. 1-03	Yes			Yes
	2016-01-28	World Agroforestry Cetner	Peer-reviewed published literature	Thanichanon et al	Secondary Forests and Local Livelihoods along a Gradient of Accessibility: a case study in Northern Laos	2013	Society & Natural Resources, 26 (11) 2013	Yes			Yes
	2016-01-28	World Agroforestry Cetner	Unpublished grey literature	Pye-Smith, C	Restoring lives and landscapes: how a partnership between local communities and the state is saving forests and improving livelihoods in Guinea	2009	Trees for Change Booklet	No
	2016-01-31	CIFOR	Peer-reviewed published literature	Lescuyer, G.	Sustainable forest management at the local scale:: a comparative analysis of community forests and domestic forests in Cameroon	2013	Small-scale Forestry 12(1): 51-66	Yes	Yes
	2016-01-31	CIFOR	Peer-reviewed published literature	Paudyal et al	Re-greening the Bare-hills through Community-managed Forests in Nepal: Can Biodiversity Conservation and Livelihoods go together across the Landscape?	2015	Paper presented in 8th ANZIF Conference "Beyond Tenure: managing forests across the landscape", Novotel Forest Resort Creswick, Victoria, Australia 13 -15 April 2015	Cannot locate
	2016-01-31	CIFOR	Unpublished grey literature	Fox et al	Swidden, rubber and carbon: can REDD+ work for people and the environment in Montane Mainland Southeast Asia?	2011	CGIAR Research Program on Climate Change, Agriculture and Food Security (CCAFS) Working Paper No. 9	Yes	Yes
	2016-01-31	CIFOR	Unpublished grey literature	Oyono, P.R.	Is decentralization in natural resource management leading to livelihoods improvement and sustainability?: evidence from Central Africa	2007	Ministry of Agriculture and Rural Development of Ethiopia with other stakeholders, Addis Ababa, Ethiopia	Cannot locate
	2016-01-31	CIFOR	Peer-reviewed published literature	Rist et al	The impacts of selective logging on non-timber forest products of livelihood importance	2011	Forest Ecology and Management 268: 5769	No
	2016-01-31	CIFOR	Unpublished grey literature	Sunderland et al	Forest products, livelihoods and conservation: case studies on non-timber forest product systems. volume 2 – Africa	2004	CIFOR, Bogor, Indonesia	No
	2016-01-31	CIFOR	Peer-reviewed published literature	Gobeze et al	Participatory forest management and its impacts on livelihoods and forest status: the case of Bonga forest in Ethiopia	2009	International Forestry Review 11(3): 346-358	Yes	Yes
	2016-01-31	CIFOR	Peer-reviewed published literature	Phuc et al	The prospects for Payment for Ecosystem Services (PES) in Vietnam: a look at three payment schemes	2012	Human Ecology 40(2): 237-249	No
	2016-01-31	CIFOR	Peer-reviewed published literature	Yemiru et al	Forest incomes and poverty alleviation under participatory forest management in the Bale Highlands, Southern Ethiopia	2010	International Forestry Review 12(1): 66-77	Yes	Yes
											13
